# Supplementary material for: Larrea tridentata Extract Mitigates Oxidative Stress-Induced Cytotoxicity in Human Neuroblastoma SH-SY5Y Cells
Source: Antioxidants (Basel). 2019 Sep 25;8(10):427. doi: 10.3390/antiox8100427 (PMC6827101; doi:10.3390/antiox8100427)
Supplement: Supplementary file 1 [file antioxidants-08-00427-s001.pdf]

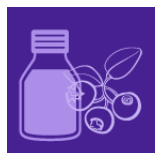

## Supplementary Material

### ***Larrea tridentata* extract mitigates oxidative stress-induced cytotoxicity in human neuronal SH-SY5Y cells**

Karla Morán-Santibañez<sup>1</sup>, Abimael H. Vasquez<sup>1</sup>, Armando Varela-Ramirez<sup>2</sup>, Veronica Henderson<sup>3</sup>, Janae Sweeney<sup>3</sup>, Valerie Odero-Marah<sup>3</sup>, Karine Fenelon<sup>1,4, \*</sup>, Rachid Skouta<sup>1,4, \*</sup>.

<sup>1</sup> Department of Chemistry and Biochemistry, Border Biomedical Research Center, The University of Texas at El Paso, El Paso, TX 79968, USA; ksmorasant@utep.edu (K.M.-S.) ORCID ID <https://orcid.org/0000-0002-3886-8599>; ahvasquez@miners.utep.edu (A.H.V.)

<sup>2</sup> Border Biomedical Research Center (BBRC), Department of Biological Sciences, the University of Texas at El Paso, El Paso, TX 79968, USA; avarela2@utep.edu (A.V.-R) ORCID ID <https://orcid.org/0000-0002-2071-4874>.

<sup>3</sup> Department of Biological Sciences, Center for Cancer Research and Therapeutic Development, Clark Atlanta University, Atlanta GA 30314; vhenderson@cau.edu (V.H.); janae.sweeney@students.cau.edu (J.S.); voderomarah@cau.edu (V. O.-M.)

<sup>4</sup> Department of Biology, University of Massachusetts, Amherst, MA 01003-9297, USA.

\*Correspondence: rskouta@umass.edu (R.S.); kfenelon@umass.edu (K.F.); Tel.: +1-915-747-5318 (R.S.); +1-915-747-8757 (K.F.)

## **TABLE OF CONTENT**

Page 2. **Figure S1.** Cytotoxicity of H<sub>2</sub>O<sub>2</sub> on SH-SY5Y cells.

Page 3. **Figure S2.** LT extracts prepare with three different solvents were tested for **12 h** on SH-SY5Y cells under **300 µM** H<sub>2</sub>O<sub>2</sub>-induced oxidative stress.

Page 4. **Figure S3.** LT extracts prepare with three different solvents were tested for **18 h** on SH-SY5Y cells under **300 µM** H<sub>2</sub>O<sub>2</sub>-induced oxidative stress.

Page 5. **Figure S4.** LT extracts prepare with three different solvents were tested for **24 h** on SH-SY5Y cells under **300 µM** H<sub>2</sub>O<sub>2</sub>-induced oxidative stress.

Page 6. **Figure S5.** LT extracts prepare with three different solvents were tested for **12 h** on SH-SY5Y cells under **150 µM** H<sub>2</sub>O<sub>2</sub>-induced oxidative stress.

Page 7. **Figure S6.** LT extracts prepare with three different solvents were tested for **18 h** on SH-SY5Y cells under **150 µM** H<sub>2</sub>O<sub>2</sub>-induced oxidative stress.

## CONTENT

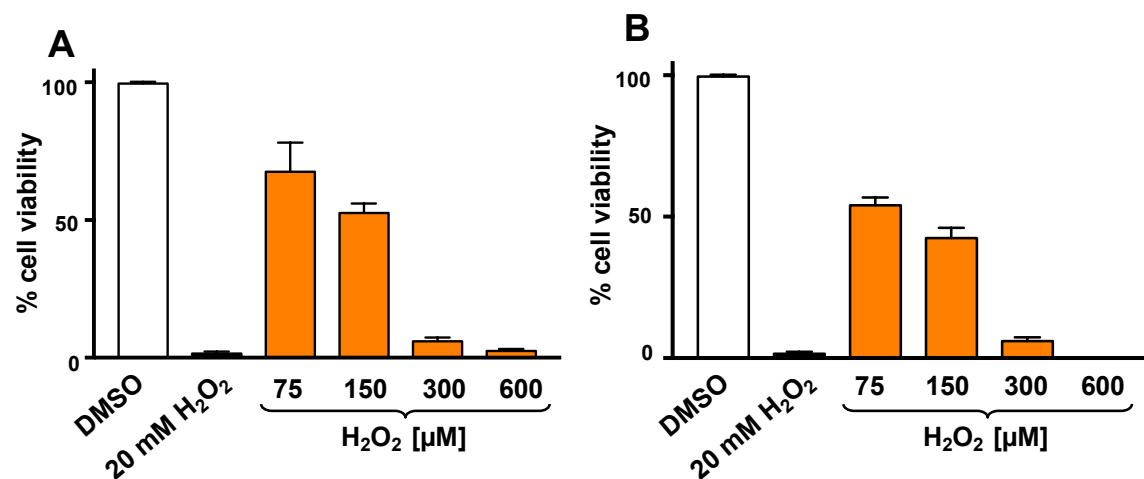

**Figure S1. Cytotoxicity of H<sub>2</sub>O<sub>2</sub> on SH-SY5Y cells.** The percentage of viable cells was measured by using the differential nuclear staining (DNS) assay and a bioimager system. Cells were exposed for **A) 18 h** and **B) 24 h** to an H<sub>2</sub>O<sub>2</sub> concentration gradient (75 to 600 μM) and their cytotoxicity was determined. DMSO 0.25% v/v was included as solvent control, and as a positive control for cytotoxicity, 20 mM of H<sub>2</sub>O<sub>2</sub>-treated cells were also included. Each bar indicates the average of three biological replicates with its corresponding standard deviation.

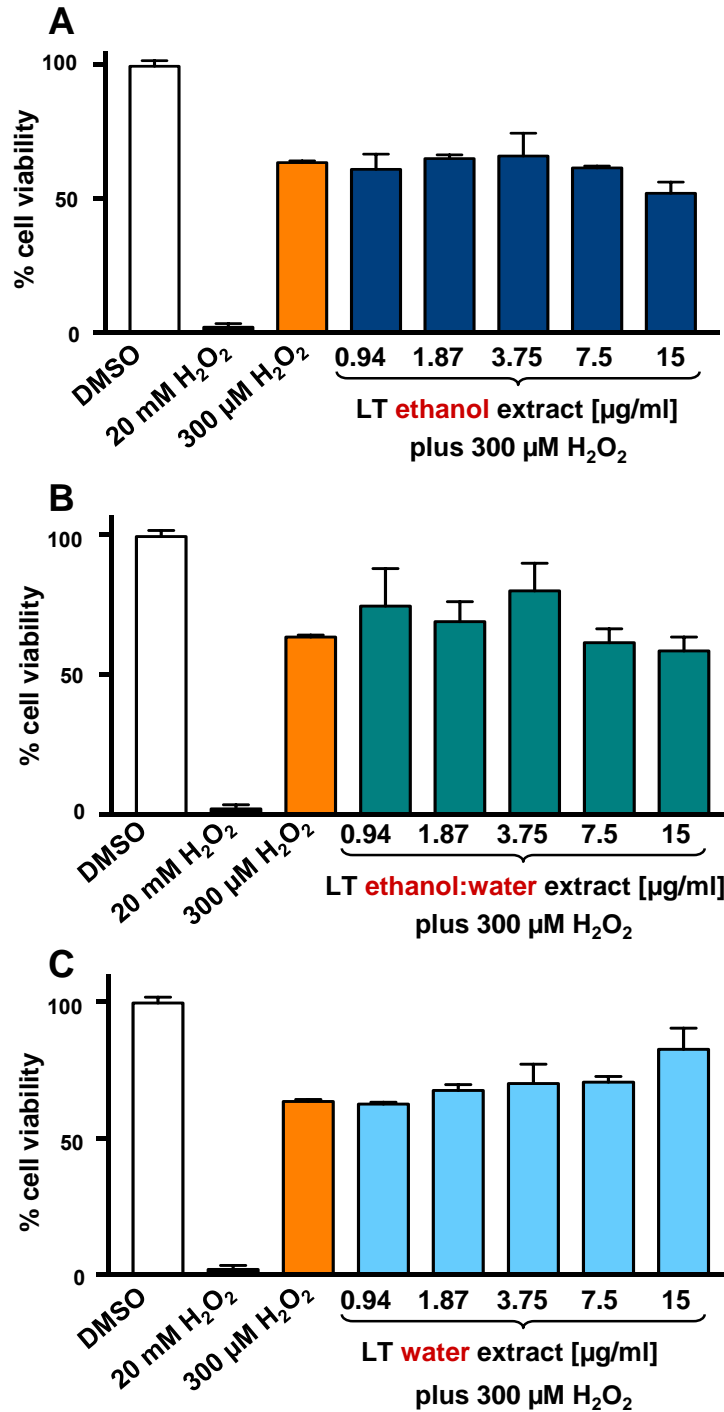

**Figure S2.** LT extracts prepared with three different solvents were tested for 12 h on SH-SY5Y cells under 300 μM H<sub>2</sub>O<sub>2</sub>-induced oxidative stress. To quantify the cell viability, the differential nuclear staining (DNS) assay and a bioimager system were used. Cells were concurrently exposed for 12 h to both a single 300 μM H<sub>2</sub>O<sub>2</sub> concentration and a concentration gradient (0.94 to 15 μg/ml) of the LT extracts in different solvents: **A**) ethanol, **B**) ethanol:water (e/w) mixture and **C**) water. Controls included cells treated with just DMSO (0.25% v/v) or 20 mM of H<sub>2</sub>O<sub>2</sub> as positive for cytotoxicity. The asterisk (\*) is indicating a significant difference between cells treated with both LT-e/w extract and H<sub>2</sub>O<sub>2</sub> (300 μM), as compared with cells treated with just 300 μM H<sub>2</sub>O<sub>2</sub> control ( $P < 0.05$ ). Each bar is showing the average of three biological replicates with its corresponding standard deviation.

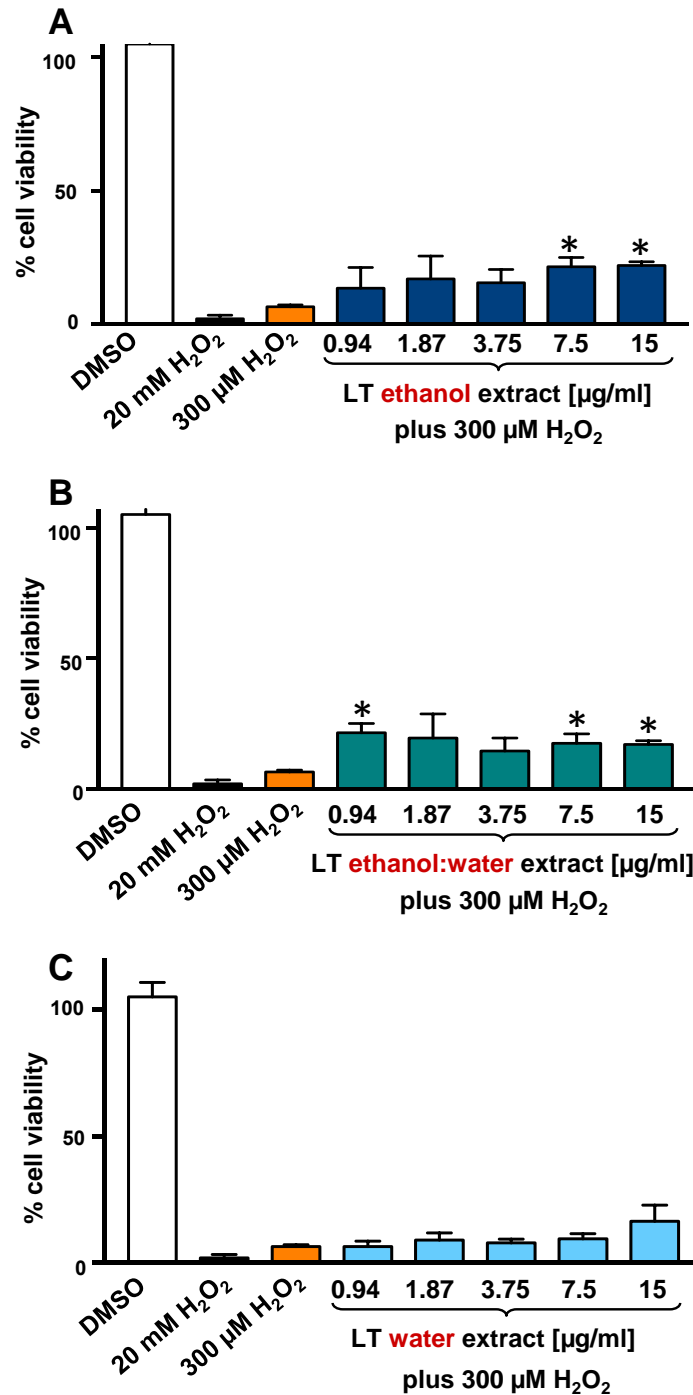

**Figure S3.** LT extracts prepared with three different solvents were tested for 18 h on SH-SY5Y cells under 300 μM H<sub>2</sub>O<sub>2</sub>-induced oxidative stress. To quantify the cell viability, the differential nuclear staining (DNS) assay and a bioimager system were used. Cells were exposed for 18 h to both a single 300 μM H<sub>2</sub>O<sub>2</sub> concentration and a concentration gradient (0.94 to 15 μg/ml) of the LT extracts in different solvents: **A**) ethanol, **B**) ethanol:water (e/w) mixture and **C**) water. Controls included cells treated with just DMSO (0.25% v/v) or 20 mM of H<sub>2</sub>O<sub>2</sub> as positive for cytotoxicity. The asterisk (\*) is indicating a significant difference between cells simultaneously treated with both LT-e/w extract and H<sub>2</sub>O<sub>2</sub> (300 μM), as compared with cells treated with just 300 μM H<sub>2</sub>O<sub>2</sub> control ( $P < 0.05$ ). Each bar is showing the average of three biological replicates with its corresponding standard deviation.

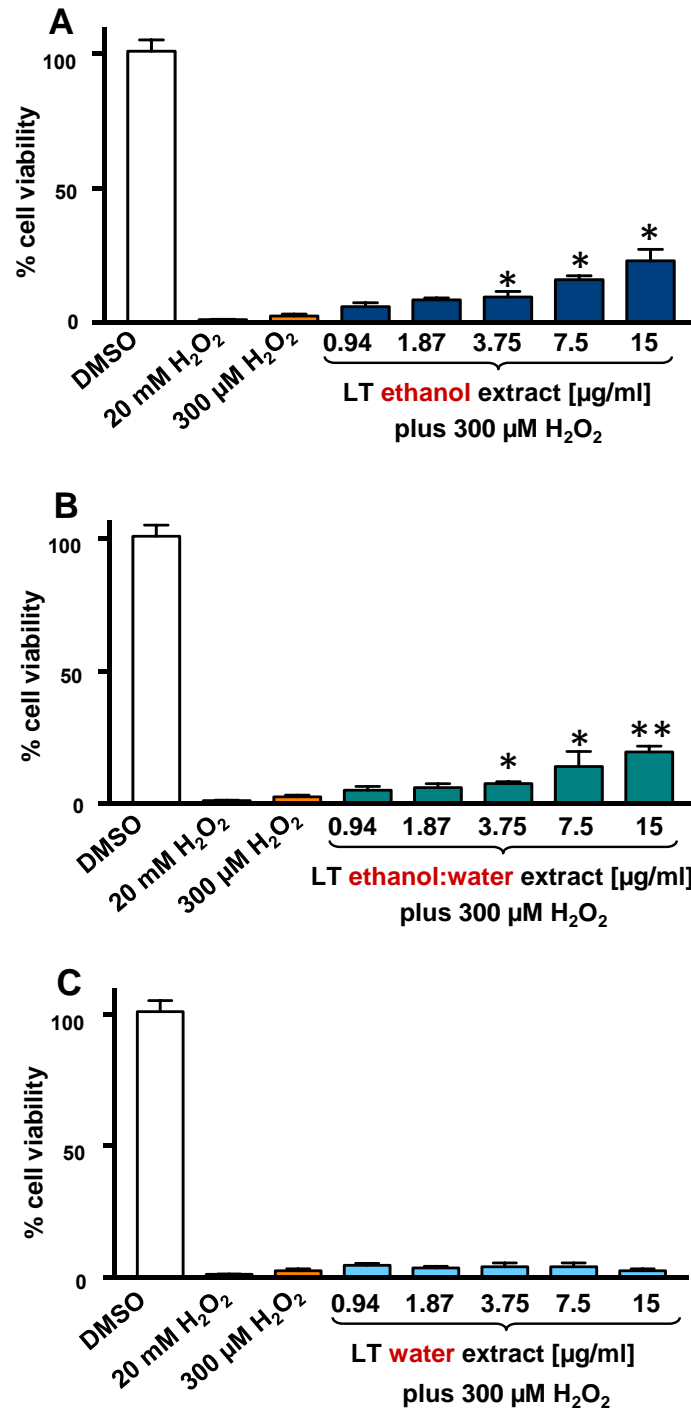

**Figure S4.** LT extracts prepared with three different solvents were tested for 24 h on SH-SY5Y cells under 300 μM H<sub>2</sub>O<sub>2</sub>-induced oxidative stress. To quantify the cell viability, the differential nuclear staining (DNS) assay and a bioimager system were used. Cells were concurrently exposed for 24 h to both a single 300 μM H<sub>2</sub>O<sub>2</sub> concentration and a concentration gradient (0.94 to 15 μg/ml) of the LT extracts in different solvents: **A**) ethanol, **B**) ethanol:water (e/w) mixture and **C**) water. Controls included cells treated with just DMSO (0.25% v/v) or 20 mM of H<sub>2</sub>O<sub>2</sub> as positive for cytotoxicity. The asterisk(s) is indicating a significant difference between cells treated with both LT-e/w extract and H<sub>2</sub>O<sub>2</sub> (300 μM), as compared with cells treated with just 300 μM H<sub>2</sub>O<sub>2</sub> control;  $P < 0.05$  (\*) and  $P < 0.01$  (\*\*), respectively. Each bar is showing the average of three biological replicates with its corresponding standard deviation.

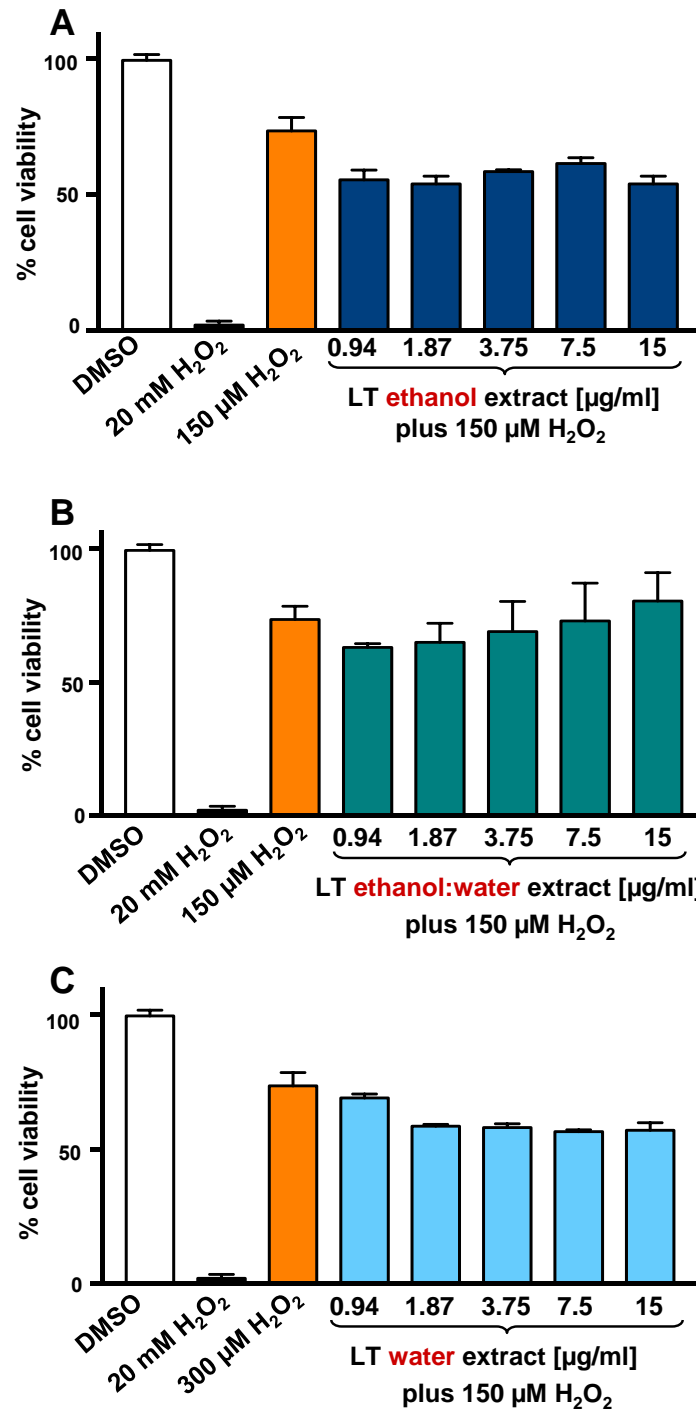

**Figure S5.** LT extracts prepared with three different solvents were tested for **12 h** on SH-SY5Y cells under **150 μM** H<sub>2</sub>O<sub>2</sub>-induced oxidative stress. To quantify the cell viability, the differential nuclear staining (DNS) assay and a bioimager system were used. Cells were simultaneously exposed for **12 h** to both a single **150 μM** H<sub>2</sub>O<sub>2</sub> concentration and a concentration gradient (0.94 to 15 μg/ml) of the LT extracts in different solvents: **A**) ethanol, **B**) ethanol:water (e/w) mixture and **C**) water. Controls included cells treated with just DMSO (0.25% v/v) or 20 mM of H<sub>2</sub>O<sub>2</sub> as positive for cytotoxicity. Each bar is showing the average of three biological replicates with its corresponding standard deviation.

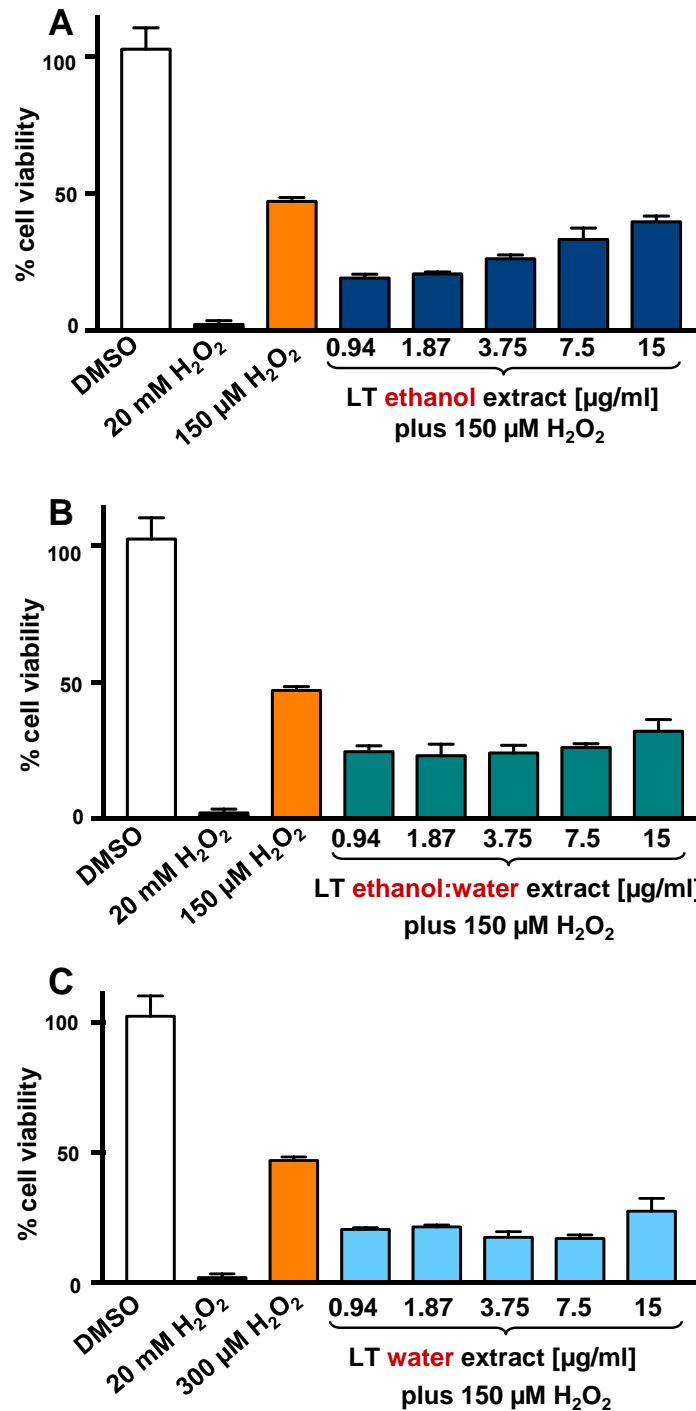

**Figure S6.** LT extracts prepared with three different solvents were tested for 18 h on SH-SY5Y cells under 150 μM H<sub>2</sub>O<sub>2</sub>-induced oxidative stress. To quantify the cell viability, the differential nuclear staining (DNS) assay and a bioimager system were used. Cells were concomitantly exposed for 18 h to both a single 150 μM H<sub>2</sub>O<sub>2</sub> concentration and a concentration gradient (0.94 to 15 μg/ml) of the LT extracts in different solvents: **A**) ethanol, **B**) ethanol:water (e/w) mixture and **C**) water. Controls included cells treated with just DMSO (0.25% v/v) or 20 mM of H<sub>2</sub>O<sub>2</sub> as positive for cytotoxicity. Each bar is showing the average of three biological replicates with its corresponding standard deviation.
